# Supplementary material for: Delayed Meal Timing, a Breakfast Skipping Model, Increased Hepatic Lipid Accumulation and Adipose Tissue Weight by Disintegrating Circadian Oscillation in Rats Fed a High-Cholesterol Diet
Source: PubMed Central journal article supplement (PMC8280346; doi:10.3389/fnut.2021.681436), 2021-07-01
Supplement: Image_1.pdf [file Image_1.pdf]

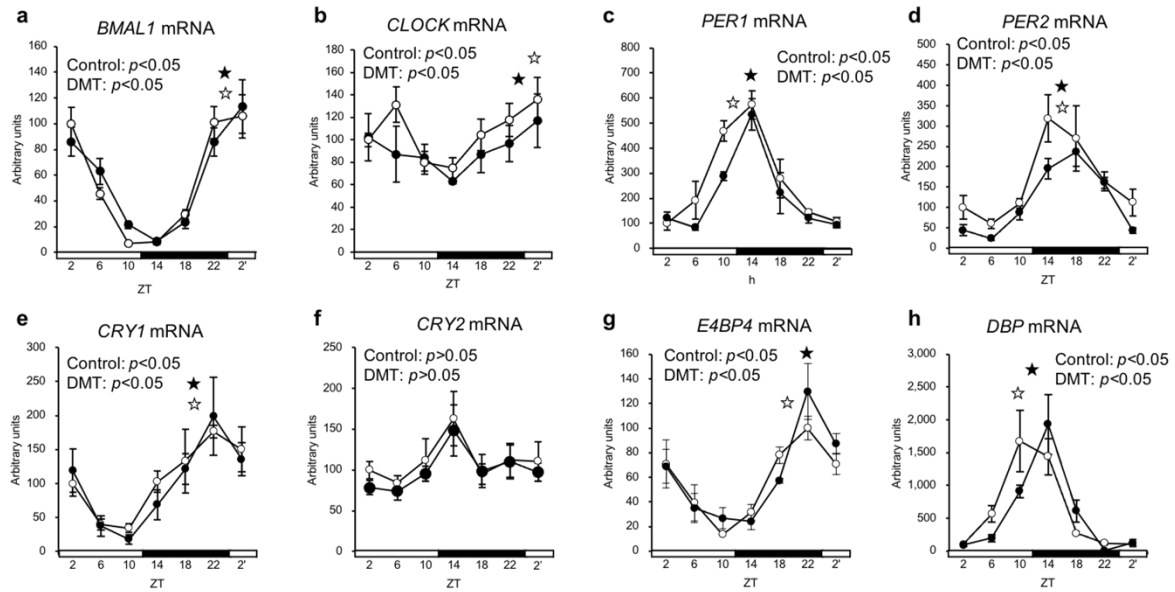

**Supplementary Figure 1. DMT slightly affected circadian oscillations of clock genes in epididymal adipose tissue.** We profiled circadian oscillations of clock genes in epididymal adipose tissue. We measured circadian oscillations of (a) *BMAL1*, (b) *CLOCK*, (c) *PER1*, (d) *PER2*, (e) *CRY1*, (f) *CRY2*, (g) *E4BP4*, (h) *DBP* genes related circadian clock in epididymal adipose tissue. The mRNA levels were analyzed using a real-time PCR, and these were normalized by *18S* rRNA level. The open and solid horizontal bars indicate the light (ZT 0-12) and dark (ZT 12-24), respectively. The value of mRNA levels are means  $\pm$  SEM ( $n=3-4$ ). The open circles indicate control group ( $\circ$ ) and the solid circles indicate DMT group ( $\bullet$ ). The results of rhythmicity analysis for hepatic circadian clock genes using JTK\_CYCLE are shown in Supplementary Table 5. The open star ( $\star$ ) and the solid star ( $\blackstar$ ) represent peak time points of circadian oscillation in the control and DMT groups, as analyzed using JTK\_CYCLE (Supplementary Table 5), respectively. List of gene names we used in the present study is provided in Table 1.
